# Supplementary material for: The Li 2 Ti 6 O 13 and Li 2 Zr 6 O 13 composite as a high-performance anode for alkali-ion batteries: a molecular dynamics study
Source: Royal Society of Chemistry journal article supplement (doi:10.1039/d4ra02998d), 2024-01-01
Supplement: d4ra02998d1.pdf [file d4ra02998d1.pdf]

## Electronic Supplementary Information

### The $\text{Li}_2\text{Ti}_6\text{O}_{13}$ and $\text{Li}_2\text{Zr}_6\text{O}_{13}$ Composite as High-Performance Anode for Alkali-Ion Batteries: A Molecular Dynamics Study

Yohandys A. Zulueta,<sup>a</sup> Minh Tho Nguyen,<sup>b,c,\*</sup> My Phuong Pham-Ho<sup>d,e</sup>

<sup>a</sup> Departamento de Física, Facultad de Ciencias Naturales y Exactas, Universidad de Oriente, CP 90500, Santiago de Cuba, Cuba

<sup>b</sup> Laboratory for Chemical Computation and Modeling, Institute for Computational Science and Artificial Intelligence, Van Lang University, Ho Chi Minh City, Viet Nam.

Email: minhtho.nguyen@vlu.edu.vn

<sup>c</sup> Faculty of Applied Technology, School of Technology, Van Lang University, Ho Chi Minh City, Viet Nam

<sup>d</sup> Faculty of Chemical Engineering, Ho Chi Minh City University of Technology (HCMUT), 268 Ly Thuong Kiet Street, District 10, Ho Chi Minh City, Viet Nam

<sup>e</sup> Vietnam National University Ho Chi Minh City, Linh Trung Ward, Thu Duc City, Ho Chi Minh City, Viet Nam.

Examples of LAMMPS input files (at 900K) of mono-, bi-crystalline  $\text{Li}_2\text{Zr}_6\text{O}_{13}$  samples, and  $\text{Li}_2\text{Zr}_6\text{O}_{13}@ \text{Li}_2\text{Ti}_6\text{O}_{13}$  composite are included for reproducibility providing further simulation details for the readers. A zip file is included with the simulation boxes.

#### 1. Input file of monocrystalline $\text{Li}_2\text{Zr}_6\text{O}_{13}$

```
#####  
#-----Variables and cell-----#  
#####  
  
clear  
units      metal      #eV,atomic charge,angstroms,ps,kelvin,bars,g/mol  
dimension 3  
boundary  p p p  
atom_style charge  
#processors * * * grid numa  
read_data MonoLZO.lmp  
  
replicate 2 2 2  
  
group      Li type 1  
group      Zr type 2  
group      O  type 3  
  
mass 1 6.94000000      # Li  
mass 2 91.22400000     # Zr  
mass 3 15.99900000     # O
```

```
variable T1 equal 900
variable Timer equal step*dt
log ${T1}.lammps
```

```
#####
#----- Pair styles and electrostatics-----#
#####
```

```
pair_style buck/coul/long 10
pair_coeff * * 0.0 1.0 0.0
pair_coeff 1 2 0.0 1.0 0.0
pair_coeff 1 3 632.1018 0.2906 0.0
pair_coeff 2 3 1453.8 0.35000 0.0
pair_coeff 3 3 22764.3 0.149 27.627
```

```
kspace_style ppm 1e-05
```

```
#####
# ----- Run Minimization -----#
#####
```

```
reset_timestep 0
timestep 0.5
thermo 10
thermo_style custom step enthalpy fmax lx ly lz vol press
min_style cg
minimize 1e-25 1e-25 5000 10000
```

```
#####
# ----- Relax Cell -----#
#####
```

```
reset_timestep 0
timestep 0.5
fix 1 all box/relax aniso 1.0 vmax 0.003
thermo 1
thermo_style custom step enthalpy fmax lx ly lz vol press
min_style cg
minimize 1e-25 1e-25 5000 10000
unfix 1
```

```
#####
# ----- Run NPT T1-----#
#####
```

```

reset_timestep 0
timestep 0.002
velocity all create ${T1} 4928 rot yes dist gaussian
fix 2 all npt temp ${T1} ${T1} 0.01 aniso 1.0 1.0 0.1
thermo_style custom step v_Timer cpu temp etotal fmax lx ly lz vol press
thermo 1000
run 5000
unfix 2

```

```

reset_timestep 0
timestep 0.002

```

```

compute mymsdLi Li msd com yes
compute mymsdO O msd com yes
variable msdxLi equal "c_mymsdLi[1]"
variable msdyLi equal "c_mymsdLi[2]"
variable msdzLi equal "c_mymsdLi[3]"
variable msdtotLi equal "c_mymsdLi[4]"
variable msdoxO equal "c_mymsdO[1]"
variable msdoyO equal "c_mymsdO[2]"
variable msdozO equal "c_mymsdO[3]"
variable msdototO equal "c_mymsdO[4]"

```

```

fix msdT2 O ave/time 1 1 2500 v_msdoxO v_msdoxO v_msdozO v_msdototO
file msdOxygen${T1}
fix msdT1 Li ave/time 1 1 2500 v_msdxLi v_msdyLi v_msdzLi v_msdtotLi file
msdLithium${T1}
fix 3 all nvt temp ${T1} ${T1} 0.01
thermo_style custom step v_Timer cpu temp etotal fmax lx ly lz vol press v_msdtotLi
v_msdototO
thermo 5000
dump dynamics all xyz 5000 monoLZO_${T1}.xyz
dump_modify dynamics every 5000 element Li Zr O first yes pbc yes
run 1000000
unfix 3
unfix msdT1
unfix msdT2

```

## 2. Input file of bi-crystalline $\text{Li}_2\text{Zr}_6\text{O}_{13}$

```

#####
#-----Variables and cell-----#
#####

```

```

clear
units metal #eV,atomic charge,angstroms,ps,kelvin,bars,g/mol
dimension 3

```

```
boundary p p p
atom_style charge
#processors * * * grid numa
read_data Bi-crystal_LZO.lmp
```

```
group      Li type 1
group      Zr type 2
group      O  type 3
```

```
mass 1 6.94000000      # Li
mass 2 91.22400000     # Zr
mass 3 15.99900000     # O
```

```
variable T1 equal 900
variable Timer equal step*dt
log ${T1}.lammps
```

```
#####
#----- Pair styles and electrostatics-----#
#####
```

```
pair_style buck/coul/long 10
pair_coeff * * 0.0 1.0 0.0
pair_coeff 1 2 0.0 1.0 0.0
pair_coeff 1 3 632.1018 0.2906 0.0
pair_coeff 2 3 1453.8 0.35000 0.0
pair_coeff 3 3 22764.3 0.149 27.627
```

```
kspace_style ppm 1e-05
```

```
#####
# ----- Run Minimization -----#
#####
```

```
reset_timestep 0
timestep 0.5
thermo 10
thermo_style custom step enthalpy fmax lx ly lz vol press
min_style cg
minimize 1e-25 1e-25 5000 10000
```

```
#####
# ----- Relax Cell -----#
#####
```

```
reset_timestep 0
timestep 0.5
```

```

fix 1 all box/relax aniso 1.0 vmax 0.003
thermo 1
thermo_style custom step enthalpy fmax lx ly lz vol press
min_style cg
minimize 1e-25 1e-25 5000 10000
unfix 1

#####
# ----- Run NPT T1-----#
#####

reset_timestep 0
timestep 0.002
velocity all create ${T1} 4928 rot yes dist gaussian
fix 2 all npt temp ${T1} ${T1} 0.01 aniso 1.0 1.0 0.1
thermo_style custom step v_Timer cpu temp etotal fmax lx ly lz vol press
thermo 1000
run 5000
unfix 2

reset_timestep 0
timestep 0.002

compute      mymsdLi Li msd com yes
compute      mymsdO O msd com yes
variable     msdxLi equal "c_mymsdLi[1]"
variable     msdyLi equal "c_mymsdLi[2]"
variable     msdzLi equal "c_mymsdLi[3]"
variable     msdtotLi equal "c_mymsdLi[4]"
variable     msdoxO equal "c_mymsdO[1]"
variable     msdoyO equal "c_mymsdO[2]"
variable     msdozO equal "c_mymsdO[3]"
variable     msdototO equal "c_mymsdO[4]"

fix          msdT2 O ave/time 1 1 2500 v_msdoxO v_msdozO v_msdototO
file msdOxygen${T1}
fix          msdT1 Li ave/time 1 1 2500 v_msdxLi v_msdyLi v_msdzLi v_msdtotLi file
msdLithium${T1}
fix          3 all nvt temp ${T1} ${T1} 0.01
thermo_style custom step v_Timer cpu temp etotal fmax lx ly lz vol press v_msdtotLi
v_msdototO
thermo 5000
dump dynamics all xyz 5000 2grainsLZO_${T1}.xyz
dump_modify dynamics every 5000 element Li Zr O first yes
run          1000000
unfix 3
unfix msdT1

```

unfix msdT2

### 3. Input file of $\text{Li}_2\text{Zr}_6\text{O}_{13}$ @ $\text{Li}_2\text{Ti}_6\text{O}_{13}$ composite

```
#####  
#-----Variables and cell-----#  
#####  
  
clear  
units      metal      #eV,atomic charge,angstroms,ps,kelvin,bars,g/mol  
dimension 3  
boundary p p p  
atom_style charge  
#processors * * * grid numa  
read_data LTZO.lmp  
  
group      Li type 1  
group      Zr type 2  
group      O type 3  
group      Ti type 4  
  
mass 1 6.94000000      # Li  
mass 4 47.86700000     # Ti  
mass 3 15.99900000     # O  
mass 2 91.22400000     # Zr  
  
variable T1 equal 900  
variable Timer equal step*dt  
log ${T1}.lammps  
  
#####  
#----- Pair styles and electrostatics-----#  
#####  
  
pair_style buck/coul/long 10  
pair_coeff * * 0.0 1.0 0.0  
pair_coeff 1 4 0.0 1.0 0.0  
pair_coeff 2 4 0.0 1.0 0.0  
pair_coeff 2 3 1453.8 0.35000 0.0  
pair_coeff 4 4 0.0 1.0 0.0  
pair_coeff 1 2 0.0 1.0 0.0  
pair_coeff 2 4 0.0 1.0 0.0  
pair_coeff 1 3 632.1018 0.2906 0.0  
pair_coeff 3 4 985.87 0.3760 0.0  
pair_coeff 3 3 22764.3 0.149 27.627
```

```
kspace_style pppm 1e-05
```

```
#####  
# ----- Run Minimization -----#  
#####
```

```
reset_timestep 0  
timestep 0.5  
thermo 10  
thermo_style custom step enthalpy fmax lx ly lz vol press  
min_style cg  
minimize 1e-25 1e-25 5000 10000
```

```
#####  
# ----- Relax Cell -----#  
#####
```

```
reset_timestep 0  
timestep 0.5  
fix 1 all box/relax aniso 1.0 vmax 0.003  
thermo 1  
thermo_style custom step enthalpy fmax lx ly lz vol press  
min_style cg  
minimize 1e-25 1e-25 5000 10000  
unfix 1
```

```
#####  
# ----- Run NPT T1-----#  
#####
```

```
reset_timestep 0  
timestep 0.002  
velocity all create ${T1} 4928 rot yes dist gaussian  
fix 2 all npt temp ${T1} ${T1} 0.01 aniso 1.0 1.0 0.1  
thermo_style custom step v_Timer cpu temp etotal fmax lx ly lz vol press  
thermo 1000  
run 5000  
unfix 2
```

```
reset_timestep 0  
timestep 0.002
```

```
compute mymsdLi Li msd com yes
```

```

compute      mymsdO O msd com yes
variable     msdxLi equal "c_mymsdLi[1]"
variable     msdyLi equal "c_mymsdLi[2]"
variable     msdzLi equal "c_mymsdLi[3]"
variable     msdtotLi equal "c_mymsdLi[4]"
variable     msdoxO equal "c_mymsdO[1]"
variable     msdoyO equal "c_mymsdO[2]"
variable     msdozO equal "c_mymsdO[3]"
variable     msdototO equal "c_mymsdO[4]"

fix          msdT2 O ave/time 1 1 2500 v_msdoxO v_msdoxO v_msdozO v_msdototO
file msdOxygen${T1}
fix          msdT1 Li ave/time 1 1 2500 v_msdxLi v_msdyLi v_msdzLi v_msdtotLi file
msdLithium${T1}
fix          3 all nvt temp ${T1} ${T1} 0.01
thermo_style custom step v_Timer cpu temp etotal fmax lx ly lz vol press v_msdtotLi
v_msdototO
thermo 5000
#dump dynamics all xyz 5000 2grainsLZTO1_${T1}.xyz
#dump_modify dynamics every 5000 element Li Zr O Ti first yes
run          2500000
unfix 3
unfix msdT1
unfix msdT2

```
